# Supplementary material
Source: publisher figshare collection journal article supplement (https://karger.figshare.com/ndownloader/files/12793838)
Supplement: Supplementary file 1 [file 12793838]

**Supplementary Table 1** Frequency of genotypes among low (≤10 HbF%) and high (≥20 HbF%) HbF groups of patients

| SNP | Genotype |  | ≤10 HbF% (n) | Mean± SD | >20 HbF% (n) | Mean± SD | p value* |
| --- | --- | --- | --- | --- | --- | --- | --- |
| rs4527238 | CC |  | 80 | 7.13±2.29 | 55 | 24.67±3.99 | 0.009 |
| CT |  | 150 | 7.06±2.37 | 175 | 24.81±4.05 | 0.034 |
| TT | Ref | 45 | 7.23±2.4 | 125 | 25.29±3.78 |  |
| rs35680545 | CC | Ref | 40 | 7.16±2.39 | 125 | 25.29±3.78 |  |
| CT |  | 155 | 6.89±2.34 | 160 | 24.3±3.62 | 0.18 |
| TT |  | 80 | 7.5±2.23 | 70 | 25.84±4.69 | 0.017 |

* chi-square test
